# 1 Light at the end of the tunnel: FRAP assay reveals that 2 plant vacuoles start as a tubular network

---

3  
4 Elena A. Minina<sup>1,2,¶</sup>, David Scheuring<sup>3</sup>, Jana Askani<sup>2</sup>, Falco Krueger<sup>2</sup> and Karin Schumacher<sup>2,¶</sup>

5  
6 <sup>1</sup>Department of Molecular Sciences, Uppsala BioCenter, Swedish University of Agricultural Sciences  
7 and Linnean Center for Plant Biology, P.O. Box 7015, Uppsala, SE-750 07, Sweden.

8 <sup>2</sup>COS, Heidelberg University. Im Neuenheimer Feld 230. 69120 Heidelberg, Germany

9 <sup>3</sup>Plant Pathology, University of Kaiserslautern, Paul-Ehrlich Straße 22, 67663 Kaiserslautern, Germany.

10  
11 <sup>¶</sup>correspondence to:

12 E.A. Minina: [alena.minina@slu.se](mailto:alena.minina@slu.se)

13 K. Schumacher: [karin.schumacher@cos.uni-heidelberg.de](mailto:karin.schumacher@cos.uni-heidelberg.de)

14

15

## 16 Abstract

17 Plant vacuoles play key roles in cellular homeostasis performing catabolic and storage functions,  
18 regulating pH and ion balance<sup>1,2</sup>. The essential role of vacuoles for plant cell viability makes them a  
19 notoriously difficult subject to study. As a consequence, there is still no consensus on the mechanism  
20 of vacuolar establishment and the source of membrane material for it. Our previous suggestion of  
21 endoplasmic reticulum (ER) being the main contributor of membrane for growing young vacuoles<sup>3</sup> was  
22 recently challenged in a study proposing that plant vacuoles are formed *de novo* via homotypic fusion  
23 of multivesicular bodies (MVBs)<sup>4</sup>. Authors of this work pointed out issues that might explain our  
24 seemingly contradictory observations and we have thus carefully reevaluated our hypothesis.

25 Using the *Arabidopsis thaliana* root as a model, we provide a systematic overview of successive  
26 vacuolar biogenesis stages, starting from the youngest cells proximate to the quiescent center. We  
27 validate our previous conclusions by demonstrating that the vacuolar dye BCECF is fully suitable for  
28 studying the organelle morphology and provide 3D models from vacuoles of all developmental stages.  
29 We established a customized FRAP assay and proved that even at the earliest stages of biogenesis,  
30 vacuoles comprise a connected network. Together, this adds to a growing body of evidence indicating  
31 that vacuolar structures cannot originate solely from MVBs.

32

33

## 34 Keywords

35 Plant vacuole biogenesis, Vacuolar network, Root cortex, *Arabidopsis thaliana*, MVBs, Provacuoles,  
36 FRAP, vacuole

37

38

## 39 Abbreviations

40 **CLSM**, confocal laser scanning microscopy; **CTPP**, C-terminal propeptide; **BCECF**, BCECF-AM, 2',7'-Bis-  
41 (2-Carboxyethyl)-5-(and-6)-Carboxyfluorescein, Acetoxymethyl Ester; **DZ**, differentiation zone; **ER**,  
42 endoplasmic reticulum; **EZ**, elongation zone; **FRAP**, fluorescence recovery after photobleaching; **ILVs**,  
43 intraluminal vesicles; **MVBs**, multi vesicular bodies; **MZ**, meristematic zone; **NTPP**, N-terminal  
44 propeptide; **QC**, quiescent center; **SVs**, small vacuoles; **TEM**, transmission electron microscopy;

## 45 Main

---

46 Vacuoles are the largest organelles of plant cells, they play the key role in cellular homeostasis  
47 performing catabolic and storage functions, regulating pH and ion balance and are vital for plant cell  
48 adaptability to environmental changes<sup>1,2,5-7</sup>. All plant cells contain vacuoles, however these organelles  
49 are highly dynamic and vary greatly in size, morphology and content, depending on plant species, cell  
50 type, developmental stage and environmental conditions. Presence of the vacuoles in all plant cells  
51 implies that these organelles are likely to be inherited from cell to cell, but does not exclude that a  
52 subpopulation of the vacuolar structures might be possibility formed *de novo*. Plant vacuoles typically  
53 undergo massive structural changes during cell differentiation and growth, starting as relatively small  
54 organelles in meristematic cells and occupying up to 90% of the cellular volume in differentiated  
55 cells<sup>1,8</sup>. It is intriguing how such vast reorganization of the organelle is synchronized with its vital role  
56 in cellular homeostasis and responses to environmental stress stimuli. It is also an exciting question,  
57 what is the source of the vacuolar membrane (tonoplast) that supports the massive reorganization  
58 and growth of the organelle<sup>3,9,10</sup>. The knowledge about the mechanisms underpinning vacuolar  
59 biogenesis is crucial for our understanding of plant physiology. However, obtaining this knowledge is  
60 an undeniably challenging task due to the pleiotropic effects of mutations impacting vacuolar  
61 biogenesis<sup>11-13</sup> and embryo lethality of the mutants with impaired vacuolar establishment<sup>14</sup>. As the  
62 result, the over a century old debate about the origin of plant vacuoles is still ongoing<sup>3,10,15,16</sup>.

63 So far it has been suggested that plant vacuoles might originate from plastid-like structures<sup>16</sup>, or from  
64 Golgi-associated endoplasmic reticulum (ER) that undergoes autophagy-dependent modifications<sup>17</sup>,  
65 or are established with participation of ER-derived provacuoles<sup>3</sup>. The recent work by Cui et al.<sup>4</sup>  
66 proposed an intriguing hypothesis, according to which plant vacuoles start as small vacuoles (SVs) that  
67 are *de novo* produced in young meristematic cells *via* homotypic fusion of multivesicular bodies  
68 (MVBs). However, the existing body of evidence together with our data strongly suggests that  
69 homotypic fusion of MVBs would not produce fully functional vacuolar structures.

70 For instance, in agreement with the pre-existing data, Cui et al. demonstrated that vacuolar structures  
71 and MVBs are decorated with two different sets of membrane proteins. This observation alone already  
72 indicates that formation of the vacuolar membrane is unlikely to rely solely on MVBs. It plausibly  
73 requires an additional membrane source that would deliver the characteristic transmembrane  
74 proteins. Indeed, as we have demonstrated previously, the transmembrane subunits of two highly  
75 abundant tonoplast protein complexes present on all vacuolar membranes, the vacuolar H<sup>+</sup>-ATPase  
76 and the vacuolar H<sup>+</sup>-PPase are delivered to the vacuole via an MVB-independent trafficking route<sup>3</sup>.

77 Post-Golgi trafficking in general and MVBs in particular undoubtedly play an important role in plant  
78 vacuole establishment. MVBs are essential for the trafficking of proteins from ER and plasma  
79 membrane to the vacuole.<sup>18</sup> During this process, intraluminal vesicles (ILVs) of MVBs accumulate cargo  
80 sorted for delivery to the vacuole and are released into the vacuolar lumen upon MVB fusion with the  
81 tonoplast<sup>18</sup>. The presence of ILVs in the vacuolar lumen reported by Cui et al. is thus a well-described  
82 phenotype merely indicative of a functioning endomembrane trafficking towards the vacuole and  
83 does not speak for vacuoles originating from MVBs<sup>4</sup>. The mechanism regulating cargo sorting,  
84 formation of ILVs and fusion of MVBs with the tonoplast is relatively well described and known to  
85 involve factors implicated in vacuolar maintenance<sup>11,12,18</sup>. Consequently, disruptions in functionality of  
86 MVBs greatly impact vacuolar morphology<sup>11,12,19,20</sup>. Importantly, cells with aberrant MVB machinery  
87 are not devoid of the tonoplastic material, but typically contain large amount of thereof. However,  
88 these mutants fail to organize the tonoplast into an organelle with the typical vacuolar  
89 morphology<sup>11,13,20</sup>. Furthermore, some of the mutants with impaired MVB functionality have highly  
90 aberrant vacuolar morphology in young cells, where the organelle seems to undergo intensive fission  
91 and fusion, but relatively normal vacuolar morphology in the differentiated cells<sup>11,20</sup>. These data  
92 strongly indicate that MVBs play an important role in regulating the tonoplast organization but do not  
93 serve as the initial source of the vacuolar membrane.

94 Furthermore, a number of previous studies implementing whole-cell 3D TEM<sup>21</sup>, single-section TEM<sup>5</sup> or  
95 confocal microscopy<sup>1,22</sup> reported that plant vacuoles at the early stages of their establishment  
96 comprise a dynamic tubular network that might undergo temporary fragmentation during cell  
97 division. Cui and colleagues suggest that the tubular morphology of young vacuoles observed in some  
98 of the previous studies might be an artifact caused by fluorescent probes used to visualize the  
99 organelle, i.e. BCECF and SNARF<sup>3</sup>. Moreover, authors pointed out that the existing studies offer broad  
100 conclusions supported only by fragmented data obtained on specific developmental stages in different  
101 cell types. We endeavoured to address these issues and performed a series of experiments that  
102 provided a systematic overview of the vacuolar establishment process and allowed us to re-evaluate  
103 our previous findings.

104 Using *Arabidopsis thaliana* as a model organism greatly facilitated our understanding of plant vacuolar  
105 biogenesis. Owing to the simple radial symmetry, concentric distribution of tissues, reproducible  
106 position of cell types and location of the meristem at the root tip<sup>23</sup>, *Arabidopsis thaliana* primary root  
107 is an excellent system for tracking successive stages of cell differentiation and thus is optimal for  
108 studying vacuolar development. Root growth is a result of cell division and differentiation. The former  
109 occurs close to the root tip in the meristematic zone (MZ), which is maintained by the quiescent center

110 (QC). The neatly organised stem niche cells located in proximity of the QC, give rise to lineages of cell  
111 types that undergo gradual differentiation and elongation<sup>23</sup> (**Fig. 1a**). As a result, a single vertical tier  
112 of cells will represent a snapshot of successive developmental stages, with the earliest steps occurring  
113 close to the QC and the latest taking place proximal to the hypocotyl.

114 In this study we focused on implementing confocal laser scanning microscopy (CLSM,) which enables  
115 *in vivo* tracking of markers localized in plant vacuoles, thus allowing quantitative assessment of the  
116 content exchange between individual vacuolar substructures.

117 To assess if BCECF, a dye commonly used to visualize the vacuolar lumen<sup>24</sup>, affects vacuolar  
118 morphology, we compared phenotypes of vacuoles in *Arabidopsis thaliana* root cells in the absence  
119 or presence of the dye<sup>24</sup> (**Figure 1b-h**). In these experiments we used two independent transgenic lines  
120 expressing red fluorescent protein delivered to the vacuole implementing N- or C-terminal propeptide  
121 sorting signals<sup>25,26</sup>, spL-RFP and spRFP-AFVY, respectively<sup>27</sup>. To ensure that our observations are  
122 representative of vacuolar biogenesis, we assessed vacuolar morphology at successive developmental  
123 stages of the same cell type. For this, we performed high-resolution 3D confocal microscopy of an area  
124 encompassing several cell layers of the root meristem and elongation zones.

125 The imaging data was then used to select a single column of cortex cells, in which cell positions were  
126 numbered counting from the QC and 3D reconstructions were generated for the vacuoles of every  
127 second cell (**Figure 1b-e, Movie S1**). We selected cortex cells for analysis, since the 3D TEM  
128 reconstructions presented by Cui and co-authors were predominantly done on this cell type<sup>4</sup>.

129 Consistent with previously published data based on CLSM<sup>1,3</sup>, single section TEM<sup>5</sup> and whole-cell 3D  
130 TEM<sup>21</sup>, we observed a fine tubular vacuolar network in young plant cells (**Figure 1e**). The diameter of  
131 the tubules was gradually increasing with the age of the cells, eventually causing fusion of the network  
132 into balloon-like vacuolar structures that occupied most of the volume in differentiated cells (**Figure**  
133 **1b-e, Movies S1 and S2**). Seedlings of the same transgenic lines were then stained with BCECF and  
134 imaged as described above. Our data unequivocally demonstrates that BCECF does not cause  
135 discernible changes in vacuolar morphology at any of the observed stages of vacuolar biogenesis  
136 (**Figure 1f-h**). Thus, we confirm the validity of the results from the previous studies implementing  
137 BCECF staining.

138

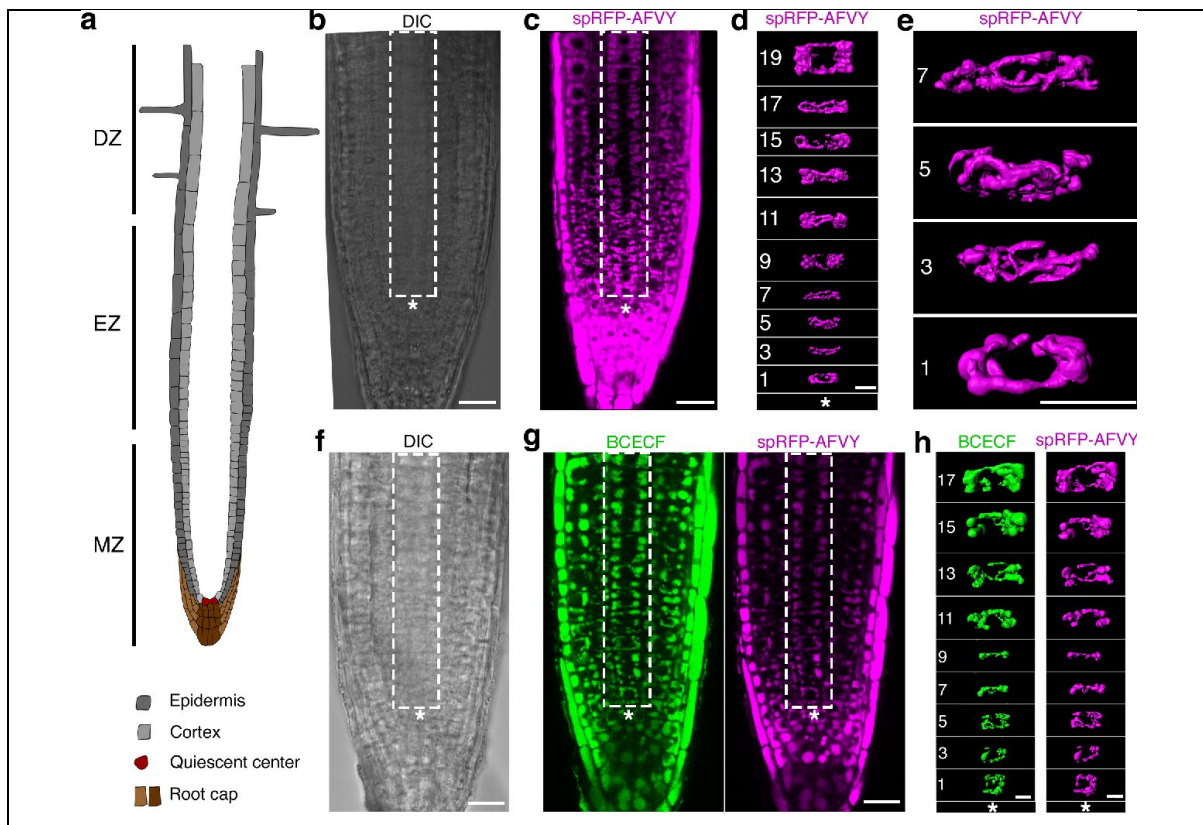

**Figure 1. Vacuolar morphology at successive stages of biogenesis visualized using the endogenously expressed vacuolar marker spRFP-AFVY and a fluorescent dye BCECF.**

(a) A scheme of an Arabidopsis roots depicting cell types presented in this study. MZ, meristematic zone containing youngest cells with earliest stages of vacuolar biogenesis close to the QC. EZ, elongation zone contains cells that entered differentiation program resulting in their elongation along vertical axis of the root. DZ, differentiation zone is generally defined by the presence of highly elongated and root hairs.

*Arabidopsis thaliana* seedlings expressing vacuolar marker spRFP-AFVY were directly scanned using CLSM (b-e) or first stained with the BCECF dye typically used to visualize vacuolar lumen (f-h). Obtained z-stack scans were then processed using Imaris software to produce 3D renderings of vacuoles in cortex cells of a single tier (rectangular selection). Successive stages of vacuolar development were tracked from the youngest cells of the root (closest to quiescent center (QC), asterisk)), cell position was numbered counting from the QC. Note, that staining with BCECF shows no discernible effect on vacuolar morphology. Importantly, vacuoles have a distinctly tubular morphology even in the youngest cells of the root cortex.

(b) DIC channel, a single optical slice taken out of a z-stack scan of an Arabidopsis root to show the position of the quiescent center (marked with an asterisk.) Rectangular selection denotes the area used for the 3D reconstruction shown in (d).

(c) RFP channel, a single optical slice taken out of the same z-stack as in (b), to show position of the cortex cells used for rendering in (d).

(d) 3D rendering of the z-stack illustrated in (b) and (c) showing vacuoles at successive stages of development in the single tier of cortex cells.

(e) Enlarged view of c showing vacuoles in the youngest cortex cells, numbers indicate cell position from the QC.

(f) DIC channel, a single optical slice taken out of a z-stack scan of an Arabidopsis root to show the position of the quiescent center (marked with an asterisk.)

(g) Green (BCECF) and magenta (spRFP-AFVY) fluorescent channels, a single optical slice taken out of a z-stack scan of an Arabidopsis root to show the position of the position of the cortex cells used for rendering in (g).

(h) 3D rendering of the z-stack illustrated in (f) and (g) showing vacuoles at successive stages of development in the single file of cortex cells.

\*, QC. Numbers indicate cell position from the QC. White rectangles denote area positions used for 3D reconstruction of vacuoles in cortex cells. Scale bars: 10  $\mu$ m

139

140 Additionally, we performed time-lapse imaging of cortex cells at successive developmental stages to  
141 visualize the mobility of the vacuolar structures (**Movie S2**). The uninterrupted directionality of  
142 vacuolar structures movement in young cells strongly implied that they are connected. However,  
143 resolution of CLSM is not sufficient to conclusively discern whether we are observing movement of  
144 connected tubular vacuolar network or chains of tethered small vacuoles. To assess whether observed  
145 vacuolar structures indeed share the luminal space, we attempted to track diffusion of fluorescent  
146 markers in the vacuolar lumen using a FRAP (Fluorescence Recovery After Photobleaching) assay  
147 (**Figure 2a-d**). In brief, the fluorophore molecules within a small vacuolar area were exposed to a pulse  
148 of high intensity excitation light resulting in an irreversible loss of their fluorescence (photobleaching),  
149 after which re-distribution of the fluorescence intensity within the vacuolar area (fluorescence  
150 recovery) was tracked to assess diffusion of fluorophore molecules between the vacuolar  
151 substructures of the cell.

152 In line with our 3D reconstruction approach described above, we made sure to provide systematic  
153 data and performed photobleaching at successive developmental stages in the cortex cells counting  
154 their position from the QC. In all cases, experiments using spL-RFP or spRFP-AFVY lines and BCECF dye  
155 stained roots produced similar results (**Figure 2, Movie S3**). At all developmental stages fluorescence  
156 recovery was observed within a couple of seconds, consistent with diffusion of the marker inside a  
157 connected vacuolar network (**Movie S3**). Even in cells containing seemingly fragmented vacuoles, we  
158 observed a rapid recovery of fluorescence in a photobleached vacuolar portion, proving that also  
159 these cells contain vacuolar networks (**Figure 2b-d**).

160 Performing FRAP assays on young plant vacuoles is a notoriously challenging task. The small size of  
161 the young vacuolar structures and their rapid movement during time-lapse imaging causes  
162 fluctuations in the fluorescence intensity that interferes with accurate detection of the intensity  
163 changes produced by diffusion of the fluorophore. Thus applying the traditional FRAP quantification  
164 methods to the highly mobile vacuolar networks of the youngest meristematic cells was yielding  
165 unreliable data. We overcame this issue by developing a customized approach for quantifying FRAP  
166 data to calculate the connectivity index (CI) of plant vacuoles (**Figure 2e-g, Figure S1**, for the detailed  
167 description see the Methods chapter). CI value of 1 indicates unrestricted diffusion of a fluorophore  
168 inside the vacuolar lumen and CI values below 0.1 would represent a lack of diffusion due to the  
169 fluorophore localization in separated compartments. We calculated connectivity indexes for cells of  
170 the meristematic zone (MZ) which contain the youngest vacuoles, elongation zone (EZ) comprising  
171 cells with vacuoles that underwent substantial fusion and differentiation zone (DZ) in which cells



172 contain large vacuoles connected into balloon-like structures. Statistical analysis revealed a similar  
 173 connectivity indexes in all three zones (**Figure 2g**), thus confirming that even at the earliest stages of  
 174 their development plant vacuoles comprise a dynamic network of connected tubules rather than  
 175 separate vesicles.

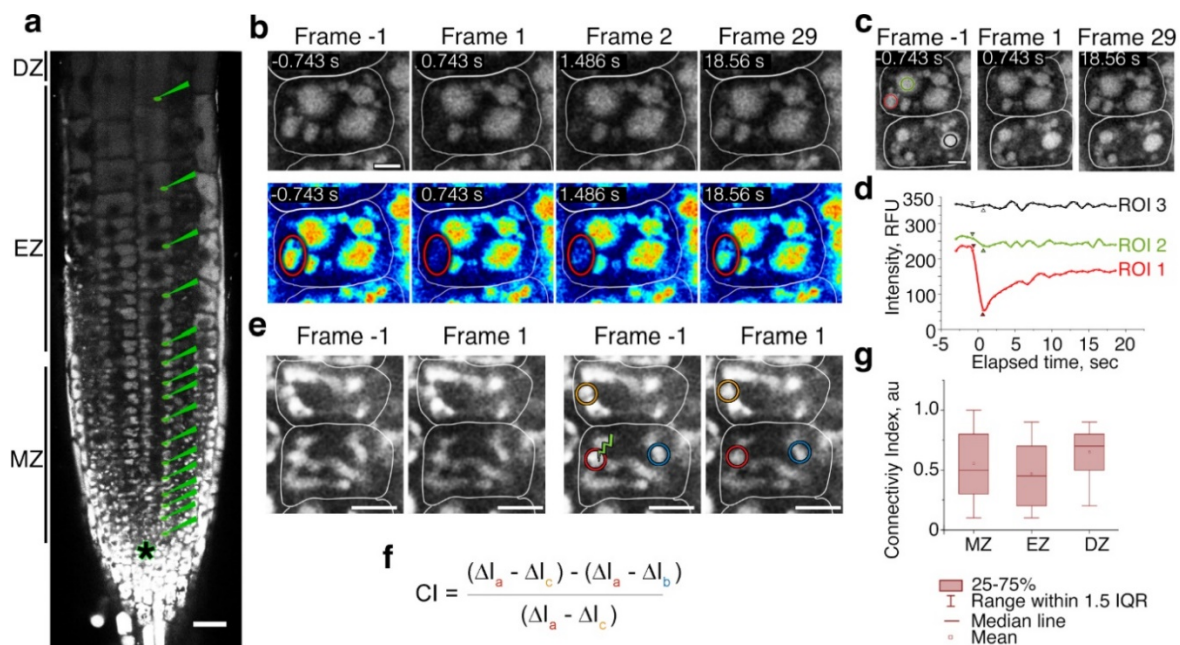

**Figure 2. FRAP assay reveals that vacuolar structures form a connected network even at the earliest stages of development.**

*Arabidopsis thaliana* seedlings expressing vacuolar marker spL-RFP were subjected to FRAP assay imaging. (a) The FRAP assay was performed on every second cortex cell counting from the QC. For each cell, a small portion of vacuolar area was subjected to photobleaching. The fluorescence recovery was then used to estimate whether vacuolar structures within each cell comprise a connected network. Scale bar, 10  $\mu$ m. \*, QC.

(b) Frames from a FRAP time-series obtained on a meristematic cell containing seemingly separated vacuolar structures. Top row shows the raw data, bottom row shows the same data colour-coded for signal intensity using Royal LUT. White lines denote cell walls, the red oval indicates a vacuolar structure within which a small spot was exposed to high intensity laser during photobleaching. Four frames were acquired prior to and 25 frames were acquired after the photobleaching. Scanning was performed at the speed of one frame per 743 msec. "Frame -1", the frame acquired right before photobleaching. "Frame 1", the first frame after photobleaching. Time in seconds, elapsed time from the photobleaching event. Increase in fluorescence within photobleached vacuolar structure is visible already on the Frame 2, less than two second after photobleaching occurred. Such rapid dynamics of recovery strongly indicates free diffusion of the fluorophore between vacuolar structures visible on the optical section of the cell. Scale bar: 5  $\mu$ m.

(c) Quantification of the FRAP imaging data illustrated in (b). Regions of interest (ROIs) were selected to represent the photobleached region of the vacuole (red), a vacuolar structure inside the same cell, which was not exposed to high intensity laser light (green) and a vacuolar region in a neighbouring cell (blue).

(d) The fluorescence intensities inside ROIs shown on (c) were measured for the FRAP time-lapse data containing four scans prior to photobleaching and 25 scans after the photobleaching. The arrows indicate data points corresponding to the Frame -1 and Frame 1. ROI1 and ROI2 show decrease in the intensity right after photobleaching, indicating that they are located in connected structures. Expectedly, the ROI3, which corresponds to a vacuolar area of another cell, does not show decrease in the intensity. Half time of fluorescence recovery in the photobleached area is shorter than 2 seconds, consistent with free diffusion of the fluorophore into the photobleached area.

(e) Frames from a FRAP series performed on highly tubulated vacuoles of young cortex cells. "Frame -1", the frame acquired right before photobleaching. "Frame 1", the first frame after photobleaching. White



lines indicate cell walls. Scale bar: 10  $\mu$ m. The left panel shows the raw data, the right panel shows the same data with indicated areas subjected to the photobleaching and used for Connectivity index calculation.

(f) Equation for the Connectivity index (CI) calculation, colored letters a, b, c indicate areas denoted on (d) with the corresponding colors.  $CI = 1$  indicates that photobleached and not photobleached areas are fully connected and diffusion rate between them is higher than the scanning speed. CI values higher than 0.1 indicate localization of the fluorophore in connected compartments, CI values lower than 0.1, indicate that fluorophore is trapped in separated compartments.

$\Delta I_a$ , intensity drop in the photobleached area of the vacuole as % of this area intensity before photobleaching.  $\Delta I_b$ , intensity drop in the not photobleached area of the same vacuole as % of this area intensity before photobleaching.  $\Delta I_c$ , intensity drop in the vacuole of neighbouring cell as % of this area intensity before photobleaching.  $\Delta I_a - \Delta I_b$ , relative loss of fluorescence within the vacuole, comparing photobleached and non-photobleached areas (areas potentially correspond to different parts of vacuolar network).  $\Delta I_a - \Delta I_c$ , reference loss of fluorescence, comparing photobleached area in one cell and non-photobleached in another (areas are in disconnected vacuoles).

(g) A two-tailed Students t-test comparing CI indexes calculated for the cells belonging to the MZ, meristematic zone (cells at the positions 1-13); EZ, elongation zone (cells at the positions 14-19), DZ, differentiation zone (cells at the positions 20 and upwards) revealed similar connection of the vacuolar structures in the cells of all three zones ( $p$ -value > 0.05). The chart shows representative data of one out of six FRAP experiments, that comprised use of 7 roots to acquire 63 FRAP series.

176

177 Cui and colleagues observed fragmentation of vacuoles using super-resolution microscopy on the  
178 fixed cells and in the experiments involving photoconversion of a vacuolar marker in the living cells.  
179 Interestingly, their photoconversion experiments revealed fragmented vacuoles in elongated cells  
180 (cell length : width more than 2:1), which should typically contain connected vacuoles in wild-type  
181 plants under normal growth conditions. However, it is well established that plant vacuoles can  
182 undergo drastic morphological changes, including fragmentation, depending on environmental  
183 stimuli<sup>1,2,4,6,28-30</sup>

184 We speculate that the discrepancies between our observations and the data reported by Cui and  
185 colleagues might originate from differences in plant growth conditions. To test this hypothesis, we  
186 compared the morphology of vacuoles in seedlings grown in two independent laboratories in two  
187 different countries. We reproducibly observed a tubular vacuolar network in young cells of seedlings  
188 grown, stained with BCECF and imaged at different facilities (**Figure S2**). Therefore, we are confident  
189 in our conclusion that under growth conditions considered as standard by the plant research  
190 community, young plant vacuoles comprise a connected tubular network. Our results provide a  
191 systematic evidence that validates, corroborates and unifies previous observations<sup>1,3,5,21</sup>.

192 In summary, in this study: (i) we argue that the existing knowledge on plant endomembrane trafficking  
193 does not support the hypothesis of vacuolar structures originating from homotypic fusion of MVBs;  
194 (ii) we provide a comprehensive overview of plant vacuolar morphology at successive developmental  
195 stages starting from the youngest cells proximal to the QC and demonstrate that even at the earliest  
196 stages vacuoles have a tubular network morphology; (ii) we determine that BCECF does not affect  
197 vacuolar morphology, thus validating conclusions from previous studies using this dye; (iii) we use a

198 customized FRAP assay to provide a systematic assessment showing that plant vacuoles comprise a  
199 connected network already at the earliest stages of development.

200

## 201 **Methods**

---

202

### 203 **Plant material and growth**

204 In this study we used *Arabidopsis thaliana* Col-0 accession wild-type plants and transgenic plants  
205 expressing spL-RFP and spRFP-AFVY markers<sup>27</sup>. Seeds were surface sterilized for 20 min in 70%  
206 Ethanol with 0.05% Triton X-100, washed in 95% Ethanol and air dried. Seedlings were grown on  
207 vertical plates containing 0.5x MS (M0222, Duchefa), supplemented with 10 mM MES (M1503,  
208 Duchefa), 1% sucrose and 0.8 % Plant agar (P1001, Duchefa), pH5.8 under long day conditions (150  
209  $\mu$ M light, 16h light, 8h darkness, 22°C)

### 210 **BCECF staining**

211 BCECF-AM (2',7'-Bis-(2-Carboxyethyl)-5-(and-6)-Carboxyfluorescein, Acetoxymethyl Ester, B1150  
212 ThermoFisher) was stored as a 10 mM stock solution in DMSO. For staining, 5-7 days old seedlings  
213 were submerged in liquid 0.5xMS (0.5x MS (M0222, Duchefa), 10 mM MES (M1503, Duchefa), 1%  
214 sucrose pH5.8) containing 10  $\mu$ M BCECF and incubated at room temperature for 2h, followed by  
215 washing for 15 min in fresh 0.5xMS liquid medium and immediate mounting for imaging.

### 216 **Confocal microscopy**

217 Images were obtained using Leica SP8 and Leica SP5 confocal microscopes with LAS X software. To  
218 avoid possible dehydration of samples during prolonged scans, seedlings were mounted in 0.5x  
219 liquid MS in a RoPod 1 chamber (<https://www.alyonaminina.org/ropod>), roots were covered with a  
220 coverslip and the chamber lid was closed to maintain humidity during imaging.

### 221 **3D**

222 Scanning was performed using Leica SP8 CLSM with 63x objective, NA 1.30. BCECF was imaged using  
223 488 nm excitation light, 490nm - 552nm emission range and the standard mode of the HyD detector.  
224 RFP fluorescence was excited using 561 nm light and 577nm - 700nm emission range was detected  
225 using the standard mode of the HyD detector. Pinhole was set to 1AU, scanning speed was set to  
226 400 Hz, line average to 3, pixel resolution was set to optimal and number of optical slices was system  
227 optimized.

228 All experiments were performed at COS, Heidelberg University, Germany. Additionally, observed  
229 vacuolar phenotypes were tested on seedlings grown at Uppsala BioCenter, SLU, Sweden using a  
230 Zeiss LSM 800 microscope equipped with GaAsp detectors and ZEN 2 software, 63x water immersion  
231 objective, NA 1.20. Excitation and emission settings were set similarly to the ones described above.

### 232 **4D**

233 Time-lapse imaging was performed with settings the same settings as used for 3D imaging. The scan  
234 area size was cropped to enable frame rate of approximately one frame per second.

### 235 **FRAP**

236 Imaging for FRAP was performed using Leica SP5, 40.0x objective NA 1.20. The excitation and  
237 emission settings were the same as used for obtaining 3D scans. To reduce photobleaching by  
238 scanning and speed up frame acquisition rate, resolution was set to 512x512 pixels, scanning speed  
239 to 600 Hz and line averaging to 1. FRAP settings were adjusted using FRAP tool of LAS AF software. A

240 crosshair tool was used to select a single dot inside vacuolar area to be exposed to high intensity  
241 laser. Photobleaching was performed for 1 second using laser intensity empirically adjusted to  
242 achieve at least 30% drop in fluorescence intensity in the selected spot. Four frames were acquired  
243 prior to photobleaching to obtain data on the normal fluctuations in the marker fluorescence  
244 intensity caused by scanning. 25 more frames were acquired after photobleaching to track signal  
245 recovery. Each FRAP time-series was ca 21 seconds in length with approximately 740 msec/frame.

### 246 3D reconstruction

247 For 3D reconstructions of vacuoles Imaris 9.2 (Bitplane) was used. For each reconstructed cell,  
248 cell walls were manually traced using at least every third slice of the z-stack based on the DIC  
249 channel. The tracing data was then used to create a cell surface reconstruction. In the next step,  
250 the surface of the analysed cells was used to create a masked channel, in which signal intensity  
251 for the voxels outside the selected cell surface were set to 0. This channel was then employed to  
252 automatically create a 3D model of vacuolar lumen of the analysed cell. The obtained model was  
253 visually compared and adjusted to the underlying signal with the background subtraction  
254 threshold option. Reconstructions of vacuolar network for individual cells were then combined  
255 into a common overview image shown on the Fig.1

### 256 FRAP quantification

257 FRAP quantification was performed using a custom designed macro for automated extraction of  
258 FRAP series from Leica project file and a slightly modified FRAP profiler plugin for ImageJ  
259 (<https://github.com/AlyonaMinina/vacFRAP>). The adjustments of the plugin included hardcoding  
260 presence in the time-lapse of 4 frames prior to photobleaching and thus building the recovery curve  
261 fit starting from the 5<sup>th</sup> frame.

### 262 Connectivity index

263 High motility of young vacuoles was causing significant fluctuations of fluorescence intensity within a  
264 selected area that was not representing changes due to diffusion of the fluorophore. Thus standard  
265 FRAP approach could not be efficiently applied for our samples. Hence we developed a customized

266 approach. We argued that diffusion of the fluorophore within aqueous solution of a vacuole is a rapid  
267 process and photobleaching of a small area would lead to a small but detectable drop of fluorescence  
268 in the whole vacuolar network. To assess the rapid changes in the fluorophore distribution we  
269 analysed FRAP series frames right before (Frame -1) and right after (Frame 1) photobleaching,  
270 measuring changes in the fluorescence intensities within selected areas. On these frames we selected  
271 a small vacuolar area that was exposed to high intensity laser (**a, Figure 2e, Figure S1**) and an area on  
272 of the vacuolar network most distant from the photobleached region (**b, Figure 2e, Figure S1**).  
273 Furthermore, an area in the vacuolar network of neighbouring cell (**c, Figure 2d, Figure S1**) was used  
274 as a control of vacuole definitely not connected to the vacuolar network in the assessed cell.

275 Connectivity index was then calculated in following steps:

- 276 •  $\Delta I_a$  = intensity drop in the photobleached area of the vacuole as % of this area intensity  
277 before photobleaching
- 278 •  $\Delta I_b$  = intensity drop in the not photobleached area of the same vacuole as % of this area  
279 intensity before photobleaching

- 280 •  $\Delta I_c$  = intensity drop in the vacuole of neighbouring cell as % of this area intensity before  
281 photobleaching
- 282 • Rel = relative loss of fluorescence within the vacuole, comparing photobleached and non-  
283 photobleached areas (areas are in potentially connected parts of vacuole)
- 284  $Rel = \Delta I_a - \Delta I_b$
- 285 • Ref = reference loss of fluorescence, comparing photobleached area in one cell and non-  
286 photobleached in another (areas are in disconnected vacuoles)
- 287  $Ref = \Delta I_a - \Delta I_c$
- 288 • CI = Connectivity Index
- 289  $CI = (Ref - Rel) / Ref$

290 CI = 0 indicates that photobleached and not photobleached areas are not connected. CI = 1  
291 indicates that photobleached and not photobleached areas are fully connected and diffusion  
292 rate between them is higher than the scanning speed. Cut-off value, the lowest CI value that  
293 corresponds to connected network was estimated empirically. To establish the cut-off value for  
294 this study we used cells of the differentiation zone as the positive control representing  
295 connected vacuoles and vacuoles in neighbouring cells as a negative control, representing  
296 disconnected vacuolar structures (Figure 2e and Figure S1). Under our conditions, the CI values  
297 lower than 0.1 reproducibly correlated with not connected vacuolar compartments. CI < 0  
298 indicates that non-photobleached area lost more signal than the photobleached area =>  
299 technical issues, most probably drift during scanning. CI > 1 indicates that there is a technical  
300 issue, most probably drift during scanning.

301 Connectivity indexes were quantified using the designated semi-automated assay implementing  
302 ImageJ macros (<https://github.com/AlyonaMinina/Connectivity-Index>). The macros were designed to  
303 first process Leica project files and extract individual FRAP series as tiff stack files and then guide the  
304 user for selecting the areas required for quantification of the CI index.

305

## 306 References

---

- 307 1. Krüger, F. & Schumacher, K. Pumping up the volume – vacuole biogenesis in *Arabidopsis*  
308 *thaliana*. *Semin. Cell Dev. Biol.* **80**, 106–112 (2018).
- 309 2. Bassham, D. C. & Raikhel, N. V. Molecular Aspects of Vacuole Biogenesis. in *Advances in*  
310 *Botanical Research* (1997).
- 311 3. Viotti, C. *et al.* The Endoplasmic Reticulum Is the Main Membrane Source for Biogenesis of  
312 the Lytic Vacuole in *Arabidopsis*. *Plant Cell* **25**, 3434–3449 (2013).
- 313 4. Cui, Y. *et al.* A whole-cell electron tomography model of vacuole biogenesis in *Arabidopsis*  
314 root cells. *Nat. Plants* **5**, 95–105 (2019).
- 315 5. Marty, F. Plant Vacuoles. *Plant Cell* **11**, 587–599 (1999).
- 316 6. Shitan, N. & Yazaki, K. Dynamism of vacuoles toward survival strategy in plants. *Biochim.*  
317 *Biophys. Acta - Biomembr.* **1862**, 183127 (2020).
- 318 7. Martinoia, E., Maeshima, M. & Neuhaus, H. E. Vacuolar transporters and their essential role  
319 in plant metabolism. *J. Exp. Bot.* **58**, 83–102 (2007).
- 320 8. Kaiser, S. & Scheuring, D. To Lead or to Follow: Contribution of the Plant Vacuole to Cell  
321 Growth. *Front. Plant Sci.* **11**, 8–13 (2020).
- 322 9. Krüger, F. & Schumacher, K. Pumping up the volume – vacuole biogenesis in *Arabidopsis*  
323 *thaliana*. *Semin. Cell Dev. Biol.* **80**, 106–112 (2018).
- 324 10. Cui, Y., Zhao, Q., Hu, S. & Jiang, L. Vacuole Biogenesis in Plants: How Many Vacuoles, How  
325 Many Models? *Trends Plant Sci.* **25**, 538–548 (2020).
- 326 11. Isono, E. *et al.* The Deubiquitinating Enzyme AMSH3 Is Required for Intracellular Trafficking  
327 and Vacuole Biogenesis in *Arabidopsis thaliana*. *Plant Cell* **22**, 1826–1837 (2010).
- 328 12. Singh, M. K. *et al.* Protein delivery to vacuole requires SAND protein-dependent Rab GTPase  
329 conversion for MVB-vacuole fusion. *Curr. Biol.* **24**, 1383–1389 (2014).
- 330 13. Gao, C. *et al.* A unique plant ESCRT component, FREE1, regulates multivesicular body protein  
331 sorting and plant growth. *Curr. Biol.* **24**, 2556–2563 (2014).
- 332 14. Rojo, E., Gillmor, C. S., Kovaleva, V., Somerville, C. R. & Raikhel, N. V. VACUOLELESS1 Is an  
333 Essential Gene Required for Vacuole Formation and Morphogenesis in *Arabidopsis*. **1**, 303–  
334 310 (2001).
- 335 15. Went, F. A. F. C. Die Vermehrung der normalen Vakuolen durch Teilung. *Jahrb. Bot.* **19**, 295–  
336 356 (1888).
- 337 16. DeVries, H. Plasmolytische Studien über die Wand der Vakuolen. *Jahrb. Bot.* **16**, 465–598  
338 (1885).
- 339 17. Marty, F. Cytochemical studies on GERL , provacuoles , and vacuoles in root meristematic



- 340 cells of Euphorbia Cell Biology : Marty. **75**, 852–856 (1978).
- 341 18. Cui, Y. *et al.* Biogenesis of Plant Prevacuolar Multivesicular Bodies. *Mol. Plant* **9**, 774–786  
342 (2016).
- 343 19. Kolb, C. *et al.* FYVE1 is essential for vacuole biogenesis and intracellular trafficking in  
344 Arabidopsis. *Plant Physiol.* **167**, 1361–1373 (2015).
- 345 20. Zheng, J., Han, S. W., Rodriguez-Welsh, M. F. & Rojas-Pierce, M. Homotypic Vacuole Fusion  
346 Requires VTI11 and Is Regulated by Phosphoinositides. *Mol. Plant* **7**, 1026–1040 (2014).
- 347 21. Seguí-Simarro, J. M. & Staehelin, L. A. Cell cycle-dependent changes in Golgi stacks, vacuoles,  
348 clathrin-coated vesicles and multivesicular bodies in meristematic cells of Arabidopsis  
349 thaliana: A quantitative and spatial analysis. *Planta* **223**, 223–236 (2006).
- 350 22. Viotti, C. *et al.* Endocytic and secretory traffic in Arabidopsis merge in the trans-Golgi  
351 network/early endosome, an independent and highly dynamic organelle. *Plant Cell* **22**, 1344–  
352 1357 (2010).
- 353 23. Lee, Y., Lee, W. S., Kim, S. & Bruno, Y. Hormonal regulation of stem cell induces maintenance  
354 in roots In *Posidonia oceanica* cadmium changes in DNA methylation and chromatin  
355 patterning. **64**, 1153–1165 (2013).
- 356 24. Scheuring, D., Schöller, M., Kleine-Vehn, J. & Löffke, C. Vacuolar Staining Methods in Plant  
357 Cells. in *Plant Cell Expansion: Methods and Protocols. Methods in Molecular Biology.* 83–92  
358 (2015). doi:10.1007/978-1-4939-1902-4\_8.
- 359 25. Ahmed, S. U. *et al.* The plant vacuolar sorting receptor AtELP is involved in transport of NH<sub>2</sub>-  
360 terminal propeptide-containing vacuolar proteins in Arabidopsis thaliana. *J. Cell Biol.* **149**,  
361 1335–1344 (2000).
- 362 26. Vitale, A. & Raikhel, N. V. What do proteins need to reach different vacuoles? *Trends Plant*  
363 *Sci.* **4**, 149–155 (1999).
- 364 27. Hunter, P. R., Craddock, C. P., Di Benedetto, S., Roberts, L. M. & Frigerio, L. Fluorescent  
365 reporter proteins for the tonoplast and the vacuolar lumen identify a single vacuolar  
366 compartment in arabidopsis cells. *Plant Physiol.* **145**, 1371–1382 (2007).
- 367 28. Gao, X. Q. *et al.* The dynamic changes of tonoplasts in guard cells are important for stomatal  
368 movement in *Vicia faba*. *Plant Physiol.* **139**, 1207–1216 (2005).
- 369 29. Löffke, C., Dünser, K., Scheuring, D. & Kleine-Vehn, J. Auxin regulates SNARE-dependent  
370 vacuolar morphology restricting cell size. *Elife* **2015**, 1–16 (2015).
- 371 30. Scheuring, D. *et al.* Actin-dependent vacuolar occupancy of the cell determines auxin-induced  
372 growth repression. *Proc. Natl. Acad. Sci. U. S. A.* **113**, 452–457 (2016).

373

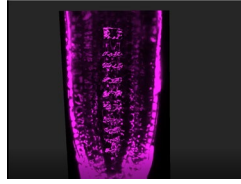

**Movie S1. 3D reconstruction of plant vacuoles in the root cortex cells reveals at successive stages of development.**

spRFP-AFVY, red fluorescent marker for vacuolar lumen, was detected in *Arabidopsis thaliana* roots using CLSM. A single tier of cortex cells was selected to reconstruct vacuolar structures at successive stages of cell differentiation. The imaging and reconstruction were performed as described in the Materials and methods chapter.

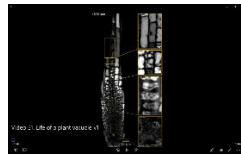

**Movie S2. Live imaging of plant vacuoles at successive stages of development.**

*Arabidopsis thaliana* roots expressing spL-RFP, red fluorescent marker for vacuolar lumen, were imaged using CLSM. Time-lapse images of a single optical section show a highly dynamic tubular vacuoles in young cells of the cortex. During cell differentiation and elongation, the thin vacuolar tubules gradually swell and eventually fuse into balloon-like structures.

\*, quiescent center; scale bar: 10  $\mu$ m.

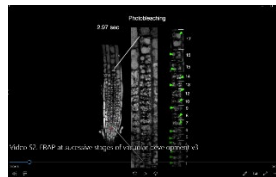

**Movie S3. FRAP at successive stages of vacuolar development.**

*Arabidopsis thaliana* seedlings expressing spRFP-AFVY, a fluorescent marker for vacuolar lumen, were subjected to FRAP assay. 4 scans were made prior to photobleaching, recovery after photobleaching was tracked on 25 frames

The overview of the root on the left shows the position of the quiescent center (QC, asterisk) and position of the cortex cells tier used for the analysis. Numbers indicate the cells position when counted from the QC.

FRAP was performed on 17 consecutive stages of vacuolar establishment to systematically assess possible changes in the vacuolar connectivity during their establishment. At all these stages we detected fluorescence recovery occurring within the matter of seconds, consistent with free diffusion of the fluorophore in the connected volumes of the vacuolar network.

Quantitative comparison of vacuolar connectivity in the meristematic, elongation and differentiation zones is shown on the Fig. 2; scale bar: 10  $\mu$ m.

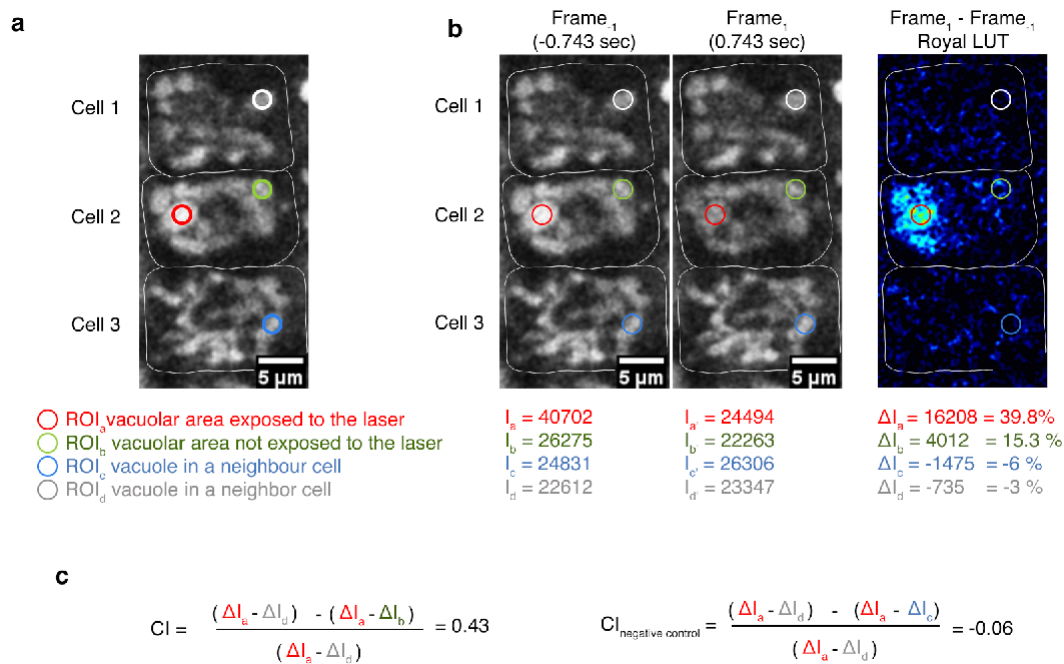

**Figure S1. Connectivity Index allows quantitative comparison of fluorescence recovery in highly mobile vacuolar structures of young root cells.**

(a) FRAP assay was performed according to the description provided in the Materials and Methods using transgenic Arabidopsis lines expressing red fluorescent marker for vacuolar lumen. An example of regions of interest (ROIs) selected on 3 cells, among which only the ROI1 in the cell 2 was exposed to high intensity laser. White lines indicate cell walls.

(b) Frame<sub>-1</sub>, was taken immediately before the start of photobleaching. Frame<sub>1</sub> was acquired right after photobleaching was finished. The numbers signify fluorescence intensity values within the regions of interest measured using ImageJ software.

To highlight the changes in the intensity caused by photobleaching, Frame<sub>1</sub> image was subtracted from Frame<sub>-1</sub> image using ImageJ "Calculator" function. The resulting image was color-coded using Royal LUT, lighter colors indicate bigger difference in the intensity. Numbers show fluorescence intensity decrease within the ROIs, which are presented in arbitrary units and as percent of the fluorescence signal within the corresponding ROI before photobleaching.

(c) Connectivity Index (CI) is calculated by comparing change in fluorescence in ROIs within the same cell and in neighbouring cells. Comparison of ROIs within the same cell reveals diffusion rate of the fluorophore within vacuolar structures of the cell. Comparison of ROIs located in different cells informs about fluctuations in fluorescence intensity caused by scanning and movement of the vacuoles. CI values higher than 0.1 indicate that fluorophore can diffuse between vacuolar structures of the cell. CI values lower than 0.1 indicate that the fluorophore is trapped within separated structures.

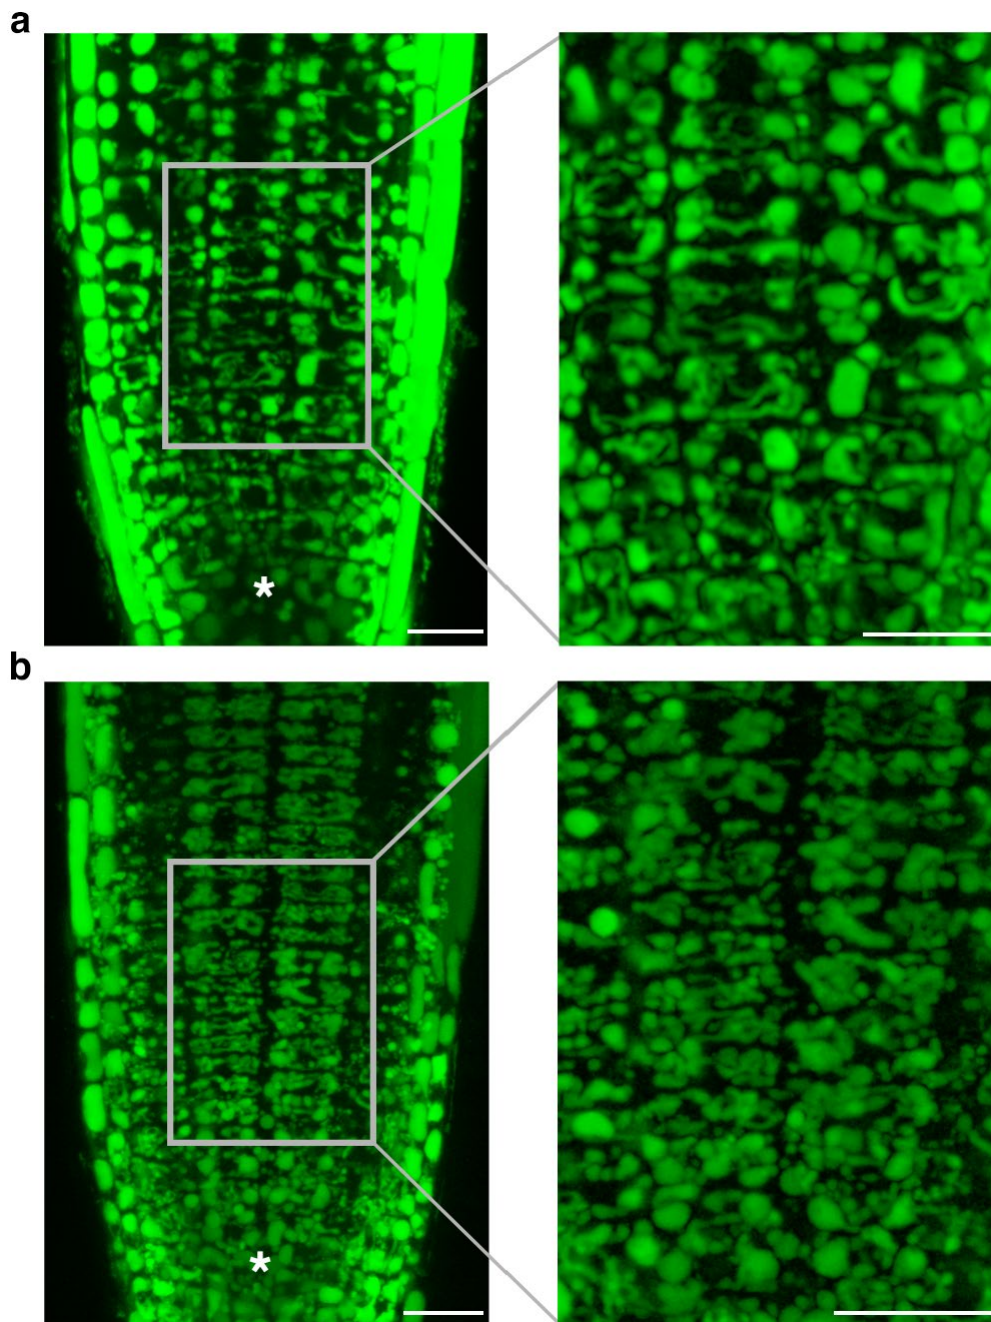

**Figure S2. Young cortex cells of seedlings grown in two independent laboratories show similar tubular vacuolar network morphology.**

(a) sprRFP-AFVY transgenic line was grown in the COS plant growth facility, University of Heidelberg, Germany. Five days old seedlings were stained with BCECF and imaged using Leica SP8 confocal microscope. Maximal projection of the BCECF channel for the part of the z-stack shows intricate tubular network in the young cells proximal to the quiescent center.

(b) Col-0 wild type seedlings were grown in the plant facility of Uppsala BioCenter, SLU, Sweden. Five days old seedlings were stained with BCECF and imaged using Zeiss LSM 800 confocal microscope. Maximal projection of the BCECF channel shows young cortex cells containing tubular vacuolar network similar to the one shown on (a).

\*, QC. Scale bar: 20  $\mu$ m.
